# Supplementary material for: Protocol and Rationale for the International Lung Screening Trial
Source: PubMed Central journal article supplement — Ann Am Thorac Soc. 2020 Apr;17(4):503–12. doi: 10.1513/AnnalsATS.201902-102OC (PMC7175983; doi:10.1513/annalsats.201902-102oc), 2020-04
Supplement: AnnalsATS.201902-102OC_lim_data_supplement.pdf [file AnnalsATS.201902-102OC_lim_data_supplement.pdf]

Online Data Supplement

**Protocol and Rationale for the International Lung Screening Trial (ILST)**

Kuan Pin Lim, Henry Marshall, Martin Tammemägi, Fraser Brims, Annette McWilliams, Emily Stone, Renee Manser, Karen Canfell, Marianne Weber, Luke Connelly, Rayleen V Bowman, Ian A Yang, Paul Fogarty, John Mayo, John Yee, Renelle Myers, Sukhinder Atkarkhattra, David CL Lam, Antoni Rosell, Christine D. Berg, Kwun M Fong and Stephen Lam,  
On behalf of the International Lung Screening Trial (ILST) Investigators

APPENDIX

Table E1. Study outcomes.

| Outcome                                                                                                                                                                                                                                                                                                                                                              | Study Aim | Primary or Secondary Outcome |
|----------------------------------------------------------------------------------------------------------------------------------------------------------------------------------------------------------------------------------------------------------------------------------------------------------------------------------------------------------------------|-----------|------------------------------|
| Proportion of individuals selected for screening                                                                                                                                                                                                                                                                                                                     | 1         | Primary                      |
| Proportion of lung cancers detected                                                                                                                                                                                                                                                                                                                                  | 1         | Primary                      |
| Positive predictive value                                                                                                                                                                                                                                                                                                                                            | 1         | Primary                      |
| Number of individuals sampled by each criteria                                                                                                                                                                                                                                                                                                                       | 1         | Secondary                    |
| Number of lung cancers detected by each criteria                                                                                                                                                                                                                                                                                                                     | 1         | Secondary                    |
| Cumulative incidence of lung cancer in PLCO <sub>m2012</sub> +ve and USPSTF -ve versus PLCO <sub>m2012</sub> -ve and USPSTF +ve individuals                                                                                                                                                                                                                          | 1         | Secondary                    |
| Sensitivity, specificity, positive predictive value comparisons between the two criteria when PLCO <sub>m2012</sub> threshold is set so that the number eligible for screening is the same by either criteria                                                                                                                                                        | 1         | Secondary                    |
| Distribution of individuals in each of nodule management groups 1, 2 and 3<br><br><i>Group 1: no or very low risk nodule(s) to be followed by the next regular planned surveillance scan (eg. CAT1 on ILST protocol);</i><br><br><i>Group 2: early recall scan (CATs 2 or 3 on protocol)</i><br><br><i>Group 3: clinical investigation (CATs 4 or 5 on protocol)</i> | 2         | Primary                      |
| Number of lung cancers in each of management groups 1, 2 and 3                                                                                                                                                                                                                                                                                                       | 2         | Secondary                    |
| Proportion of lung cancers in each of management groups 1, 2 and 3                                                                                                                                                                                                                                                                                                   | 2         | Secondary                    |
